# Supplementary material
Source: PubMed Central journal article supplement (PMC7445078)
Supplement: NIHMS1583541-supplement-S1.pdf [file NIHMS1583541-supplement-S1.pdf]

# Clonally expanded CD8 T cells patrol Alzheimer's cerebrospinal fluid

David Gate<sup>1,2</sup>, Naresha Saligrama<sup>3</sup>, Olivia Leventhal<sup>1</sup>, Andrew C. Yang<sup>4,5</sup>, Michael S. Unger<sup>6,7</sup>, Jinte Middeldorp<sup>1,2,8</sup>, Kelly Chen<sup>1</sup>, Benoit Lehallier<sup>1,2</sup>, Divya Channappa<sup>1</sup>, Mark B. De Los Santos<sup>1</sup>, Alisha McBride<sup>1,2</sup>, John Pluvinage<sup>1,9,10</sup>, Fanny Elahi<sup>11</sup>, Grace Kyin-Ye Tam<sup>1,12</sup>, Yongha Kim<sup>1,12</sup>, Michael Greicius<sup>1,12</sup>, Anthony D. Wagner<sup>13,14</sup>, Ludwig Aigner<sup>6,7</sup>, Douglas R. Galasko<sup>15</sup>, Mark M. Davis<sup>3,16,17</sup>, \*Tony Wyss-Coray<sup>1,2,5,14,18</sup>

<sup>1</sup>Department of Neurology and Neurological Sciences, Stanford University School of Medicine, Stanford, California, USA.

<sup>2</sup>Veterans Administration Palo Alto Healthcare System, Palo Alto, CA, USA.

<sup>3</sup>Department of Microbiology and Immunology, School of Medicine, Stanford University, Stanford, California, USA.

<sup>4</sup>Department of Bioengineering, Stanford University, Stanford, California, USA.

<sup>5</sup>Chemistry, Engineering, and Medicine for Human Health (ChEM-H), Stanford University, Stanford, California, USA.

<sup>6</sup>Institute of Molecular Regenerative Medicine, Paracelsus Medical University, Salzburg, Austria.

<sup>7</sup>Spinal Cord Injury and Tissue Regeneration Center Salzburg (SCI-TReCS), Paracelsus Medical University, Salzburg, Austria.

<sup>8</sup>Department of Translational Neuroscience, University Medical Center Utrecht Brain Center, Utrecht University, Utrecht, The Netherlands

<sup>9</sup>Medical Scientist Training Program, Stanford University School of Medicine, Stanford, CA, USA.

<sup>10</sup>Stem Cell Biology and Regenerative Medicine Graduate Program, Stanford University School of Medicine, Stanford, California, USA.

<sup>11</sup>Department of Neurology, Memory and Aging Center, University of California at San Francisco (UCSF), San Francisco, California, USA.

<sup>12</sup>Functional Imaging in Neuropsychiatric Disorders (FIND) Lab, Department of Neurology and Neurological Sciences, Stanford University School of Medicine, Stanford, California, USA.

<sup>13</sup>Department of Psychology, Stanford University, Stanford, California, USA.

<sup>14</sup>Wu Tsai Neurosciences Institute, Stanford University, Stanford, CA, USA. Stanford Neurosciences Institute, Stanford University, Stanford, California, USA.

<sup>15</sup>Department of Neurosciences, University of California, San Diego, La Jolla, California, USA.

<sup>16</sup>Institute for Immunity, Transplantation and Infection, Stanford University School of Medicine, Stanford, California, USA.

<sup>17</sup>Howard Hughes Medical Institute, Stanford University School of Medicine, Stanford, California, USA.

<sup>18</sup>Paul F. Glenn Center for the Biology of Aging, Stanford University School of Medicine, Stanford, California, USA.

\*Corresponding author: [twc@stanford.edu](mailto:twc@stanford.edu)

**Supplementary Table 1. AD T cell literature.**

A list of publications focused on AD adaptive immunity with key findings, methodologies and sample sizes for each study.

**Supplementary Table 2. Cohort characteristics.**

Sample size, sex characteristics, average age, ethnicity, education and cognitive score data are provided for study cohorts.

**Supplementary Table 3. Markers used for immune profiling by mass cytometry.**

Markers used in mass cytometry experiments included 21 cell surface antibodies and DNA interchelators.

**Supplementary Table 4. CITRUS model features.**

P-values a derived from comparing MCI/AD (n=23) vs. healthy (n=23) subjects; unpaired two-sided *t-test*.

**Supplementary Table 5. Significance of diagnosis on classical immune variables reveals alterations in CD8<sup>+</sup> T cells.**

Dependent variables are listed, with corresponding p-values, marginal means, standard error and 95% confidence interval values for each group (n=57 healthy, n= 23 MCI/AD; unpaired two-sided *t-test* with Bonferroni correction).

**Supplementary Table 6. Characteristics of subjects used for post-mortem immunohistochemistry analysis.**

Age, sex, post-mortem interval and pathology notes for each subject used for histology in cohort 3.

**Supplementary Table 7. TCR sequences from plate-seq experiments.**

T cell receptor sequences of each subject from plate-seq.

**Supplementary Table 8. Differentially expressed genes of several of the most highly expanded clones that have been previously associated with AD.**

Published studies related to differentially expressed genes of top AD T cell clones.

**Supplementary Table 9. GLIPH results from clustering AD CSF plate-seq TCRs.**

GLIPH algorithm results from plate-seq experiments.

**Supplementary Table 10. List of 80 MHC-I peptides included in the pool used in antigen presentation experiments.**

Amino acid lengths, species and antigens of the 80 MHC-I peptides used in antigen screening experiments.

**Supplementary Table 11. List of candidate peptides, sequence, antigen name and their HLA restriction for 15 candidate peptides used in antigen presentation experiments.**

Amino acid lengths, species, antigens and HLA specificity of peptides used in TCR stimulation experiments.

**Supplementary Table 12. Group characteristics for all study subjects.**

Group sizes, average age, sex, ethnicity, education, cognitive scores, APOE genotypes and biomarker levels of all study subjects.
